# Supplementary material for: MiR-146a-5p suppresses activation and proliferation of hepatic stellate cells in nonalcoholic fibrosing steatohepatitis through directly targeting Wnt1 and Wnt5a
Source: PubMed Central journal article supplement (PMC4633641; doi:10.1038/srep16163), 2015-11-05
Supplement: srep16163-s1.pdf [file srep16163-s1.pdf]

**MiR-146a-5p suppresses activation and proliferation of hepatic stellate cells in nonalcoholic fibrosing steatohepatitis through directly targeting Wnt1 and**

**Wnt5a**

Jinghua Du, Xuemin Niu, Yang Wang, Lingbo Kong, Rongqi Wang, Yuguo Zhang, Suxian Zhao, Yuemin Nan\*

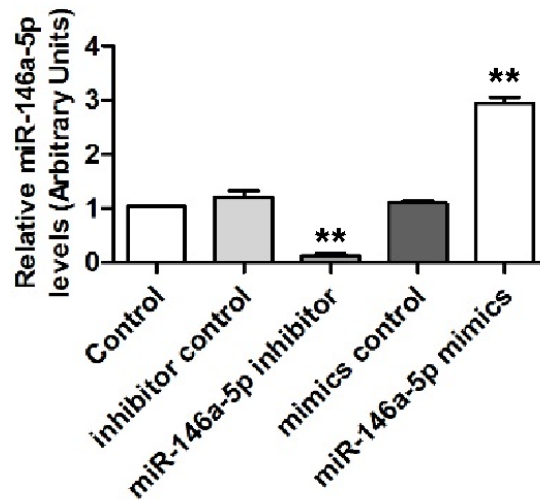

**Supplementary Figure 1:** The miR-146a-5p expression was regulated by miR-146a-5p inhibitor and mimics. The expression of miR-146a-5p was validated by qRT-PCR after transfected with miR-146a-5p inhibitor and mimics. The miR-146a-5p expression was significantly down-regulated by miR-146a-5p inhibitor and was up-regulated by miR-146a-5p mimics. Values are mean  $\pm$  SD, \*\* $P < 0.01$  compared with control.
